# Supplementary material for: Multi-layered analyses using directed partitioning to identify and discriminate between biogenic amines
Source: Royal Society of Chemistry journal article supplement (doi:10.1039/b708583d), 2007-01-01
Supplement: b708583d.pdf [file b708583d.pdf]

## Electronic Supporting Information (ESI) for

# Multi-Layered Analyses Using Directed Partitioning to Identify and Discriminate between Biogenic Amines

Toby L. Nelson, Ivy Tran, Tim G. Ingallinera, Marc S. Maynor, and John J. Lavigne\*

*Department of Chemistry and Biochemistry, University of South Carolina,  
Columbia, South Carolina 29208;  
E-mail: lavigne@mail.chem.sc.edu*

### Single layered analysis: Polymer 1 sensor responding to all biogenic amines

**Table S1.** Group frequencies

| BDA | HistA | PeDA | SperM | SpermD | TryptA | TyrA |
|-----|-------|------|-------|--------|--------|------|
| 84  | 84    | 84   | 84    | 84     | 84     | 84   |

**Table S2.** Group means

|          | BDA   | HistA | PeDA  | SperM | SpermD | TryptA | TyrA  |
|----------|-------|-------|-------|-------|--------|--------|-------|
| VAR00002 | 0.015 | 0.015 | 0.016 | 0.018 | 0.018  | 0.015  | 0.015 |
| VAR00003 | 0.022 | 0.022 | 0.024 | 0.023 | 0.025  | 0.022  | 0.022 |
| VAR00004 | 0.030 | 0.029 | 0.030 | 0.028 | 0.029  | 0.029  | 0.029 |
| VAR00005 | 0.029 | 0.029 | 0.029 | 0.027 | 0.028  | 0.028  | 0.028 |
| VAR00006 | 0.019 | 0.020 | 0.019 | 0.018 | 0.018  | 0.019  | 0.019 |
| VAR00007 | 0.009 | 0.010 | 0.009 | 0.008 | 0.008  | 0.010  | 0.010 |
| VAR00008 | 0.004 | 0.004 | 0.003 | 0.004 | 0.003  | 0.004  | 0.004 |
| VAR00009 | 0.001 | 0.001 | 0.001 | 0.004 | 0.002  | 0.002  | 0.002 |
| VAR00010 | 0.001 | 0.001 | 0.001 | 0.003 | 0.002  | 0.001  | 0.002 |

**Table S3.** Between groups F-matrix -- df = 8 574

|        | BDA      | HistA    | PeDA    | SperM    | SpermD  | TryptA | TyrA  |
|--------|----------|----------|---------|----------|---------|--------|-------|
| BDA    | 0.000    |          |         |          |         |        |       |
| HistA  | 68.931   | 0.000    |         |          |         |        |       |
| PeDA   | 239.621  | 205.070  | 0.000   |          |         |        |       |
| SperM  | 1322.318 | 1132.778 | 731.542 | 0.000    |         |        |       |
| SpermD | 1289.061 | 1119.781 | 557.256 | 108.470  | 0.000   |        |       |
| TryptA | 73.435   | 71.446   | 163.465 | 1052.719 | 971.628 | 0.000  |       |
| TyrA   | 164.778  | 114.639  | 161.385 | 835.084  | 790.500 | 33.032 | 0.000 |

Wilks' lambda

Lambda = 0.0008 df = 8 6 581

Approx. F = 189.9052 df = 48 2828 prob = 0.0000

**Table S4.** Classification functions

|          | BDA         | HistA       | PeDA        | SperM       | SpermD      | TryptA      | TyrA        |
|----------|-------------|-------------|-------------|-------------|-------------|-------------|-------------|
| CONSTANT | -989624.648 | -991605.439 | -988760.439 | -987364.104 | -988367.205 | -991699.594 | -991191.671 |
| VAR00002 | 6530334.383 | 6531402.299 | 6522092.763 | 6485045.491 | 6494977.758 | 6524046.891 | 6511041.855 |
| VAR00003 | 2.20824E+07 | 2.21133E+07 | 2.20902E+07 | 2.21389E+07 | 2.21460E+07 | 2.21341E+07 | 2.21462E+07 |
| VAR00004 | 7586394.463 | 7589037.869 | 7589834.705 | 7556527.471 | 7566879.140 | 7579261.578 | 7570005.539 |
| VAR00005 | 2.38860E+07 | 2.39025E+07 | 2.38341E+07 | 2.37759E+07 | 2.37813E+07 | 2.39049E+07 | 2.38915E+07 |
| VAR00006 | 1.00609E+07 | 1.00901E+07 | 1.01069E+07 | 1.01902E+07 | 1.01897E+07 | 1.00858E+07 | 1.01001E+07 |
| VAR00007 | 1.96638E+07 | 1.96714E+07 | 1.96303E+07 | 1.95136E+07 | 1.95426E+07 | 1.96725E+07 | 1.96513E+07 |
| VAR00008 | 1.57877E+07 | 1.57985E+07 | 1.57561E+07 | 1.58091E+07 | 1.57931E+07 | 1.58089E+07 | 1.58097E+07 |
| VAR00009 | 0.000       | 0.000       | 0.000       | 0.000       | 0.000       | 0.000       | 0.000       |
| VAR00010 | 3.53533E+07 | 3.53995E+07 | 3.53684E+07 | 3.53350E+07 | 3.53604E+07 | 3.53929E+07 | 3.53896E+07 |

**Table S5.**

| Variable    | F-to-remove | Tolerance | Variable   | F-to-enter | Tolerance |
|-------------|-------------|-----------|------------|------------|-----------|
| 2 VAR00002  | 47.69       | 0.082317  | 9 VAR00009 | 11.30      | 0.000977  |
| 3 VAR00003  | 74.75       | 0.005188  |            |            |           |
| 4 VAR00004  | 15.78       | 0.006047  |            |            |           |
| 5 VAR00005  | 59.74       | 0.002159  |            |            |           |
| 6 VAR00006  | 55.89       | 0.014965  |            |            |           |
| 7 VAR00007  | 85.96       | 0.008790  |            |            |           |
| 8 VAR00008  | 70.46       | 0.006023  |            |            |           |
| 10 VAR00010 | 24.83       | 0.002005  |            |            |           |

**Table S6.** Classification matrix (cases in row categories classified into columns)

|        | BDA | HistA | PeDA | SperM | SpermD | TryptA | TyrA | %correct |
|--------|-----|-------|------|-------|--------|--------|------|----------|
| BDA    | 83  | 1     | 0    | 0     | 0      | 0      | 0    | 99       |
| HistA  | 0   | 72    | 0    | 0     | 0      | 12     | 0    | 86       |
| PeDA   | 0   | 0     | 84   | 0     | 0      | 0      | 0    | 100      |
| SperM  | 0   | 0     | 0    | 73    | 11     | 0      | 0    | 87       |
| SpermD | 0   | 0     | 4    | 18    | 62     | 0      | 0    | 74       |
| TryptA | 0   | 0     | 0    | 0     | 0      | 75     | 9    | 89       |
| TyrA   | 0   | 0     | 0    | 0     | 0      | 3      | 81   | 96       |
| Total  | 83  | 73    | 88   | 91    | 73     | 90     | 90   | 90       |

**Table S7.** Jackknifed classification matrix

|        | BDA | HistA | PeDA | SperM | SpermD | TryptA | TyrA | %correct |
|--------|-----|-------|------|-------|--------|--------|------|----------|
| BDA    | 83  | 1     | 0    | 0     | 0      | 0      | 0    | 99       |
| HistA  | 0   | 72    | 0    | 0     | 0      | 12     | 0    | 86       |
| PeDA   | 0   | 0     | 84   | 0     | 0      | 0      | 0    | 100      |
| SperM  | 0   | 0     | 0    | 71    | 13     | 0      | 0    | 85       |
| SpermD | 0   | 0     | 4    | 19    | 61     | 0      | 0    | 73       |
| TryptA | 0   | 0     | 0    | 0     | 0      | 74     | 10   | 88       |
| TyrA   | 0   | 0     | 0    | 0     | 0      | 3      | 81   | 96       |
| Total  | 83  | 73    | 88   | 90    | 74     | 89     | 91   | 89       |

**Eigenvalues**

## Canonical correlations

|       |       |       |       |       |       |
|-------|-------|-------|-------|-------|-------|
| 0.987 | 0.872 | 0.809 | 0.682 | 0.485 | 0.178 |
|-------|-------|-------|-------|-------|-------|

## Cumulative proportion of total dispersion

|       |       |       |       |       |       |
|-------|-------|-------|-------|-------|-------|
| 0.860 | 0.930 | 0.973 | 0.992 | 0.999 | 1.000 |
|-------|-------|-------|-------|-------|-------|

Wilks' lambda= 0.001  
 Approx.F= 189.931 df= 48, 2828 p-tail= 0.0000

Pillai's trace= 3.121  
 Approx.F= 78.465 df= 48, 3474 p-tail= 0.0000

Lawley-Hotelling trace= 44.627  
 Approx.F= 532.114 df= 48, 3434 p-tail= 0.0000

**Table S8.** Canonical discriminant functions

|          | 1         | 2         | 3          | 4         | 5        | 6        |
|----------|-----------|-----------|------------|-----------|----------|----------|
| Constant | -210.738  | 165.427   | 472.014    | -535.799  | -727.664 | -278.559 |
| VAR00002 | 2570.259  | 2024.405  | 2053.760   | 1367.800  | 4010.962 | 2756.219 |
| VAR00003 | -2197.160 | -5323.783 | -12363.614 | 5885.433  | 7839.602 | 561.458  |
| VAR00004 | 1542.382  | 3101.093  | 2787.986   | 1949.150  | 1620.206 | 2555.419 |
| VAR00005 | 8121.792  | -4939.713 | -7419.670  | 5410.182  | 9667.847 | 3229.234 |
| VAR00006 | -7676.166 | -991.531  | -868.526   | 5470.299  | 3020.657 | 108.759  |
| VAR00007 | 9697.833  | 2407.033  | -5298.398  | 5191.521  | 6865.460 | 5157.672 |
| VAR00008 | -299.507  | -8567.542 | -5408.829  | 241.903   | 9163.249 | -816.270 |
| VAR00009 | .         | .         | .          | .         | .        | .        |
| VAR00010 | 2316.137  | 528.331   | -7277.546  | 13344.468 | 8686.948 | 7174.742 |

**Table S9.** Canonical discriminant functions -- standardized by within variances

|          | 1      | 2      | 3      | 4      | 5      | 6      |
|----------|--------|--------|--------|--------|--------|--------|
| VAR00002 | 1.245  | 0.981  | 0.995  | 0.663  | 1.944  | 1.336  |
| VAR00003 | -1.613 | -3.907 | -9.074 | 4.319  | 5.754  | 0.412  |
| VAR00004 | 1.794  | 3.607  | 3.243  | 2.267  | 1.884  | 2.972  |
| VAR00005 | 8.709  | -5.297 | -7.956 | 5.802  | 10.367 | 3.463  |
| VAR00006 | -4.408 | -0.569 | -0.499 | 3.141  | 1.735  | 0.062  |
| VAR00007 | 6.038  | 1.499  | -3.299 | 3.232  | 4.274  | 3.211  |
| VAR00008 | -0.258 | -7.383 | -4.661 | 0.208  | 7.897  | -0.703 |
| VAR00009 | .      | .      | .      | .      | .      | .      |
| VAR00010 | 1.968  | 0.449  | -6.184 | 11.340 | 7.382  | 6.097  |

**Table S10.** Canonical scores of group means

|        | 1      | 2      | 3      | 4      | 5      | 6      |
|--------|--------|--------|--------|--------|--------|--------|
| BDA    | 6.172  | -0.249 | 1.484  | -1.580 | 0.103  | -0.166 |
| HistA  | 4.975  | -0.973 | 1.287  | 1.767  | 0.376  | -0.043 |
| PeDA   | 0.812  | 3.306  | 0.648  | 0.258  | -0.712 | 0.128  |
| SperM  | -9.570 | -2.423 | 0.979  | -0.233 | -0.412 | 0.135  |
| SpermD | -9.240 | 1.682  | -0.604 | 0.014  | 0.720  | -0.174 |
| TryptA | 4.259  | -0.281 | -1.480 | -0.460 | 0.587  | 0.308  |
| TyrA   | 2.592  | -1.061 | -2.314 | 0.233  | -0.662 | -0.189 |

## Analysis layer 1: Differentiate amines grouped by class

**Table S11.** Group frequencies

| AliphAm | AromAm | PolyAm |
|---------|--------|--------|
| 168     | 252    | 168    |

**Table S12.** Group means

|          | AliphAm | AromAm | PolyAm |
|----------|---------|--------|--------|
| VAR00002 | 0.016   | 0.015  | 0.018  |
| VAR00003 | 0.023   | 0.022  | 0.024  |
| VAR00004 | 0.030   | 0.029  | 0.029  |
| VAR00005 | 0.029   | 0.028  | 0.027  |
| VAR00006 | 0.019   | 0.019  | 0.018  |
| VAR00007 | 0.009   | 0.010  | 0.008  |
| VAR00008 | 0.003   | 0.004  | 0.004  |
| VAR00009 | 0.001   | 0.002  | 0.003  |
| VAR00010 | 0.001   | 0.001  | 0.002  |

**Table S13.** Between groups F-matrix -- df = 8 578

|         | AliphAm | AromAm  | PolyAm |
|---------|---------|---------|--------|
| AliphAm | 0.000   |         |        |
| AromAm  | 104.225 | 0.000   |        |
| PolyAm  | 770.090 | 969.264 | 0.000  |

Wilks' lambda

Lambda = 0.0253 df = 8 2 585  
 Approx. F= 381.6624 df = 16 1156 prob = 0.0000

**Table S14.** Classification functions

|          | AliphAm     | AromAm      | PolyAm      |
|----------|-------------|-------------|-------------|
| CONSTANT | -965454.691 | -967871.452 | -966080.336 |
| VAR00002 | 5853548.909 | 5853263.132 | 5846121.255 |
| VAR00003 | 2.23587E+07 | 2.24003E+07 | 2.23934E+07 |
| VAR00004 | 7182676.994 | 7178859.161 | 7171172.385 |
| VAR00005 | 2.25975E+07 | 2.26334E+07 | 2.25846E+07 |
| VAR00006 | 1.12732E+07 | 1.12850E+07 | 1.13213E+07 |
| VAR00007 | 1.77736E+07 | 1.77948E+07 | 1.77262E+07 |
| VAR00008 | 1.58694E+07 | 1.58958E+07 | 1.59160E+07 |
| VAR00009 | 0.000       | 0.000       | 0.000       |
| VAR00010 | 3.49101E+07 | 3.49499E+07 | 3.49046E+07 |

**Table S15.**

| Variable    | F-to-remove | Tolerance | Variable   | F-to-enter | Tolerance |
|-------------|-------------|-----------|------------|------------|-----------|
| 2 VAR00002  | 5.69        | 0.074313  | 9 VAR00009 | 2.60       | 0.000827  |
| 3 VAR00003  | 180.40      | 0.003600  |            |            |           |
| 4 VAR00004  | 6.23        | 0.005863  |            |            |           |
| 5 VAR00005  | 116.63      | 0.002045  |            |            |           |
| 6 VAR00006  | 75.54       | 0.013722  |            |            |           |
| 7 VAR00007  | 133.39      | 0.010470  |            |            |           |
| 8 VAR00008  | 145.89      | 0.005139  |            |            |           |
| 10 VAR00010 | 61.77       | 0.001604  |            |            |           |

**Table S16.** Classification matrix (cases in row categories classified into columns)

|         | AliphAm | AromAm | PolyAm | %correct |
|---------|---------|--------|--------|----------|
| AliphAm | 165     | 3      | 0      | 98       |
| AromAm  | 2       | 250    | 0      | 99       |
| PolyAm  | 0       | 5      | 163    | 97       |
| Total   | 167     | 258    | 163    | 98       |

**Table S17.** Jackknifed classification matrix

|         | AliphAm | AromAm | PolyAm | %correct |
|---------|---------|--------|--------|----------|
| AliphAm | 162     | 6      | 0      | 96       |
| AromAm  | 2       | 250    | 0      | 99       |
| PolyAm  | 0       | 5      | 163    | 97       |
| Total   | 164     | 261    | 163    | 98       |

Eigenvalues

|        |       |
|--------|-------|
| 15.279 | 1.425 |
|--------|-------|

Canonical correlations

|       |       |
|-------|-------|
| 0.969 | 0.767 |
|-------|-------|

Cumulative proportion of total dispersion

|       |       |
|-------|-------|
| 0.915 | 1.000 |
|-------|-------|

Wilks' lambda= 0.025  
 Approx.F= 381.662 df= 16, 1156 p-tail= 0.0000

Pillai's trace= 1.526  
 Approx.F= 233.091 df= 16, 1158 p-tail= 0.0000

Lawley-Hotelling trace= 16.704  
 Approx.F= 602.371 df= 16, 1154 p-tail= 0.0000

**Table S18.** Canonical discriminant functions

|          | 1         | 2          |
|----------|-----------|------------|
| Constant | -106.430  | 828.517    |
| VAR00002 | 839.129   | 198.433    |
| VAR00003 | -965.926  | -14608.354 |
| VAR00004 | 1052.319  | 1452.751   |
| VAR00005 | 4128.911  | -12010.057 |
| VAR00006 | -4708.192 | -4677.824  |
| VAR00007 | 7045.146  | -6557.040  |
| VAR00008 | -3457.603 | -9605.694  |
| VAR00009 | .         | .          |
| VAR00010 | 3557.064  | -13438.581 |

**Table S19.** Canonical discriminant functions -- standardized by within variances

|          | 1      | 2       |
|----------|--------|---------|
| VAR00002 | 0.517  | 0.122   |
| VAR00003 | -0.888 | -13.432 |
| VAR00004 | 1.323  | 1.826   |
| VAR00005 | 4.877  | -14.187 |
| VAR00006 | -3.153 | -3.133  |
| VAR00007 | 4.565  | -4.248  |
| VAR00008 | -3.453 | -9.594  |
| VAR00009 | .      | .       |
| VAR00010 | 3.431  | -12.962 |

**Table S20.** Canonical scores of group means

|         | 1      | 2      |
|---------|--------|--------|
| AliphAm | 2.261  | 1.751  |
| AromAm  | 2.600  | -1.122 |
| PolyAm  | -6.161 | -0.068 |

## Analysis layer 2: Differentiation within grouped amines - aliphatic amines

**Table S21.** Group frequencies

| BDA | PeDA |
|-----|------|
| 84  | 84   |

**Table S22.** Group means

|          | BDA   | PeDA  |
|----------|-------|-------|
| VAR00002 | 0.015 | 0.016 |
| VAR00003 | 0.022 | 0.024 |
| VAR00004 | 0.030 | 0.030 |
| VAR00005 | 0.029 | 0.029 |
| VAR00006 | 0.019 | 0.019 |
| VAR00007 | 0.009 | 0.009 |
| VAR00008 | 0.004 | 0.003 |
| VAR00009 | 0.001 | 0.001 |
| VAR00010 | 0.001 | 0.001 |

**Table S23.** Between groups F-matrix -- df = 9 158

|      | BDA      | PeDA  |
|------|----------|-------|
| BDA  | 0.000    |       |
| PeDA | 1309.095 | 0.000 |

Wilks' lambda

Lambda = 0.0132 df = 9 1 166  
 Approx. F= 1309.0951 df = 9 158 prob = 0.0000

**Table S24.** Classification functions

|          | BDA          | PeDA         |
|----------|--------------|--------------|
| CONSTANT | -2780991.555 | -2783074.142 |
| VAR00002 | 2.98860E+07  | 2.99226E+07  |
| VAR00003 | 4.32186E+07  | 4.32119E+07  |
| VAR00004 | 4.44897E+07  | 4.46457E+07  |
| VAR00005 | 4.66494E+07  | 4.65055E+07  |
| VAR00006 | 3.55961E+07  | 3.57130E+07  |
| VAR00007 | 5.92671E+07  | 5.92111E+07  |
| VAR00008 | 3.23756E+07  | 3.21034E+07  |
| VAR00009 | 2.96717E+07  | 2.98157E+07  |
| VAR00010 | 7.07332E+07  | 7.08485E+07  |

**Table S25.**

| Variable    | F-to-remove | Tolerance | Variable | F-to-enter | Tolerance |
|-------------|-------------|-----------|----------|------------|-----------|
| 2 VAR00002  | 1.70        | 0.059535  |          |            |           |
| 3 VAR00003  | 0.03        | 0.096300  |          |            |           |
| 4 VAR00004  | 17.41       | 0.027893  |          |            |           |
| 5 VAR00005  | 11.14       | 0.018122  |          |            |           |
| 6 VAR00006  | 8.23        | 0.017469  |          |            |           |
| 7 VAR00007  | 1.05        | 0.118313  |          |            |           |
| 8 VAR00008  | 46.05       | 0.040967  |          |            |           |
| 9 VAR00009  | 8.08        | 0.037025  |          |            |           |
| 10 VAR00010 | 4.45        | 0.034543  |          |            |           |

**Table S26.** Classification matrix (cases in row categories classified into columns)

|       | BDA | PeDA | %correct |
|-------|-----|------|----------|
| BDA   | 84  | 0    | 100      |
| PeDA  | 0   | 84   | 100      |
| Total | 84  | 84   | 100      |

**Table S27.** Jackknifed classification matrix

|       | BDA | PeDA | %correct |
|-------|-----|------|----------|
| BDA   | 84  | 0    | 100      |
| PeDA  | 0   | 84   | 100      |
| Total | 84  | 84   | 100      |

Eigenvalues74.569Canonical correlations0.993Cumulative proportion of total dispersion1.000

Wilks' lambda= 0.013  
 Approx.F= 1309.094 df= 9, 158 p-tail= 0.0000

Pillai's trace= 0.987  
 Approx.F= 1309.094 df= 9, 158 p-tail= 0.0000

Lawley-Hotelling trace= 74.569  
 Approx.F= 1309.095 df= 9, 158 p-tail= 0.0000



**Table S28.** Canonical discriminant functions

|          | 1          |
|----------|------------|
| Constant | -121.310   |
| VAR00002 | 2131.928   |
| VAR00003 | -390.262   |
| VAR00004 | 9083.775   |
| VAR00005 | -8387.702  |
| VAR00006 | 6809.004   |
| VAR00007 | -3261.064  |
| VAR00008 | -15851.959 |
| VAR00009 | 8393.316   |
| VAR00010 | 6713.689   |

**Table S29.** Canonical discriminant functions -- standardized by within variances

|          | 1      |
|----------|--------|
| VAR00002 | 0.425  |
| VAR00003 | -0.044 |
| VAR00004 | 1.899  |
| VAR00005 | -1.919 |
| VAR00006 | 1.695  |
| VAR00007 | -0.238 |
| VAR00008 | -2.363 |
| VAR00009 | 1.154  |
| VAR00010 | 0.897  |

**Table S30.** Canonical scores of group means

|      | 1      |
|------|--------|
| BDA  | -8.584 |
| PeDA | 8.584  |

## Analysis layer 2: Differentiation within grouped amines - aromatic amines

**Table S31.** Group frequencies

| HistA | TryptA | TyrA |
|-------|--------|------|
| 84    | 84     | 84   |

**Table S32.** Group means

|          | HistA | TryptA | TyrA  |
|----------|-------|--------|-------|
| VAR00002 | 0.015 | 0.015  | 0.015 |
| VAR00003 | 0.022 | 0.022  | 0.022 |
| VAR00004 | 0.029 | 0.029  | 0.029 |
| VAR00005 | 0.029 | 0.028  | 0.028 |
| VAR00006 | 0.020 | 0.019  | 0.019 |
| VAR00007 | 0.010 | 0.010  | 0.010 |
| VAR00008 | 0.004 | 0.004  | 0.004 |
| VAR00009 | 0.001 | 0.002  | 0.002 |
| VAR00010 | 0.001 | 0.001  | 0.002 |

**Table S33.** Between groups F-matrix -- df = 9 241

|        | HistA   | TryptA | TyrA  |
|--------|---------|--------|-------|
| HistA  | 0.000   |        |       |
| TryptA | 297.951 | 0.000  |       |
| TyrA   | 367.417 | 98.455 | 0.000 |

Wilks' lambda

Lambda = 0.0135 df = 9 2 249  
 Approx. F= 203.8426 df = 18 482 prob = 0.0000

**Table S34.** Classification functions

|          | HistA        | TryptA       | TyrA         |
|----------|--------------|--------------|--------------|
| CONSTANT | -2140604.318 | -2139166.569 | -2138362.364 |
| VAR00002 | 1.67778E+07  | 1.67939E+07  | 1.67523E+07  |
| VAR00003 | 3.09272E+07  | 3.09238E+07  | 3.09461E+07  |
| VAR00004 | 3.76131E+07  | 3.75863E+07  | 3.75813E+07  |
| VAR00005 | 3.63952E+07  | 3.63874E+07  | 3.63876E+07  |
| VAR00006 | 3.11592E+07  | 3.11098E+07  | 3.11033E+07  |
| VAR00007 | 3.92106E+07  | 3.92562E+07  | 3.92167E+07  |
| VAR00008 | 2.45970E+07  | 2.45822E+07  | 2.45512E+07  |
| VAR00009 | 4.60522E+07  | 4.59953E+07  | 4.60748E+07  |
| VAR00010 | 4.12095E+07  | 4.12601E+07  | 4.12239E+07  |

**Table S35.**

| Variable    | F-to-remove | Tolerance | Variable | F-to-enter | Tolerance |
|-------------|-------------|-----------|----------|------------|-----------|
| 2 VAR00002  | 86.85       | 0.096924  |          |            |           |
| 3 VAR00003  | 4.40        | 0.018273  |          |            |           |
| 4 VAR00004  | 2.33        | 0.013660  |          |            |           |
| 5 VAR00005  | 0.19        | 0.049563  |          |            |           |
| 6 VAR00006  | 8.52        | 0.040055  |          |            |           |
| 7 VAR00007  | 11.25       | 0.049903  |          |            |           |
| 8 VAR00008  | 5.81        | 0.057055  |          |            |           |
| 9 VAR00009  | 12.34       | 0.010695  |          |            |           |
| 10 VAR00010 | 5.11        | 0.018330  |          |            |           |

**Table S36.** Classification matrix (cases in row categories classified into columns)

|        | HistA | TryptA | TyrA | %correct |
|--------|-------|--------|------|----------|
| HistA  | 84    | 0      | 0    | 100      |
| TryptA | 0     | 82     | 2    | 98       |
| TyrA   | 0     | 0      | 84   | 100      |
| Total  | 84    | 82     | 86   | 99       |

**Table S37.** Jackknifed classification matrix

|        | HistA | TryptA | TyrA | %correct |
|--------|-------|--------|------|----------|
| HistA  | 84    | 0      | 0    | 100      |
| TryptA | 0     | 82     | 2    | 98       |
| TyrA   | 0     | 1      | 83   | 99       |
| Total  | 84    | 83     | 85   | 99       |

Eigenvalues

|        |       |
|--------|-------|
| 15.529 | 3.487 |
|--------|-------|

Canonical correlations

|       |       |
|-------|-------|
| 0.969 | 0.882 |
|-------|-------|

Cumulative proportion of total dispersion

|       |       |
|-------|-------|
| 0.817 | 1.000 |
|-------|-------|

Wilks' lambda= 0.013  
 Approx.F= 203.843 df= 18, 482 p-tail= 0.0000

Pillai's trace= 1.717  
 Approx.F= 162.909 df= 18, 484 p-tail= 0.0000

Lawley-Hotelling trace= 19.016  
 Approx.F= 253.551 df= 18, 480 p-tail= 0.0000

**Table S38.** Canonical discriminant functions

|          | 1         | 2          |
|----------|-----------|------------|
| Constant | -229.178  | -117.725   |
| VAR00002 | 1103.715  | 8927.779   |
| VAR00003 | -1223.478 | -4603.832  |
| VAR00004 | 3567.367  | 167.490    |
| VAR00005 | 915.357   | -300.405   |
| VAR00006 | 6371.152  | -263.593   |
| VAR00007 | -2566.802 | 9433.556   |
| VAR00008 | 4022.058  | 5778.866   |
| VAR00009 | 1004.875  | -17903.536 |
| VAR00010 | -3410.357 | 8943.024   |

**Table S39.** Canonical discriminant functions -- standardized by within variances

|          | 1      | 2      |
|----------|--------|--------|
| VAR00002 | 0.289  | 2.337  |
| VAR00003 | -0.402 | -1.512 |
| VAR00004 | 1.216  | 0.057  |
| VAR00005 | 0.176  | -0.058 |
| VAR00006 | 1.324  | -0.055 |
| VAR00007 | -0.387 | 1.421  |
| VAR00008 | 0.563  | 0.809  |
| VAR00009 | 0.187  | -3.336 |
| VAR00010 | -0.594 | 1.558  |

**Table S40.** Canonical scores of group means

|        | 1      | 2      |
|--------|--------|--------|
| HistA  | 5.496  | -0.329 |
| TryptA | -2.147 | 2.420  |
| TyrA   | -3.349 | -2.091 |

## Analysis layer 2: Differentiation within grouped amines - polyamines

**Table S41.** Group frequencies

| SperM | SpermD |
|-------|--------|
| 84    | 84     |

**Table S42.** Group means

|          | SperM | SpermD |
|----------|-------|--------|
| VAR00002 | 0.018 | 0.018  |
| VAR00003 | 0.023 | 0.025  |
| VAR00004 | 0.028 | 0.029  |
| VAR00005 | 0.027 | 0.028  |
| VAR00006 | 0.018 | 0.018  |
| VAR00007 | 0.008 | 0.008  |
| VAR00008 | 0.004 | 0.003  |
| VAR00009 | 0.004 | 0.002  |
| VAR00010 | 0.003 | 0.002  |

**Table S43.** Between groups F-matrix -- df = 7 160

|        | SperM  | SpermD |
|--------|--------|--------|
| SperM  | 0.000  |        |
| SpermD | 60.668 | 0.000  |

Wilks' lambda

Lambda = 0.2737 df = 7 1 166  
 Approx. F= 60.6683 df = 7 160 prob = 0.0000

**Table S44.** Classification functions

|          | SperM        | SpermD       |
|----------|--------------|--------------|
| CONSTANT | -81126.458   | -81605.233   |
| VAR00002 | -528014.263  | -528452.629  |
| VAR00003 | 4270034.920  | 4282858.067  |
| VAR00004 | -1570378.045 | -1572802.104 |
| VAR00005 | 4353261.332  | 4366115.964  |
| VAR00006 | -2175684.026 | -2190480.089 |
| VAR00007 | 2624955.188  | 2643826.671  |
| VAR00008 | 4159658.295  | 4164993.503  |
| VAR00009 | 0.000        | 0.000        |
| VAR00010 | 0.000        | 0.000        |

**Table S45.**

| Variable   | F-to-remove | Tolerance | Variable    | F-to-enter | Tolerance |
|------------|-------------|-----------|-------------|------------|-----------|
| 2 VAR00002 | 0.12        | 0.080826  | 9 VAR00009  | 4.91       | 0.000283  |
| 3 VAR00003 | 11.52       | 0.003448  | 10 VAR00010 | 0.26       | 0.000688  |
| 4 VAR00004 | 1.44        | 0.004844  |             |            |           |
| 5 VAR00005 | 12.95       | 0.001670  |             |            |           |
| 6 VAR00006 | 27.76       | 0.009492  |             |            |           |
| 7 VAR00007 | 50.04       | 0.007335  |             |            |           |
| 8 VAR00008 | 2.64        | 0.003236  |             |            |           |

**Table S46.** Classification matrix (cases in row categories classified into columns)

|        | SperM | SperMD | %correct |
|--------|-------|--------|----------|
| SperM  | 82    | 2      | 98       |
| SperMD | 11    | 73     | 87       |
| Total  | 93    | 75     | 92       |

**Table S47.** Jackknifed classification matrix

|        | SperM | SperMD | %correct |
|--------|-------|--------|----------|
| SperM  | 81    | 3      | 96       |
| SperMD | 15    | 69     | 82       |
| Total  | 96    | 72     | 89       |

Eigenvalues2.654Canonical correlations0.852Cumulative proportion of total dispersion1.000

Wilks' lambda= 0.274  
 Approx.F= 60.668 df= 7, 160 p-tail= 0.0000

Pillai's trace= 0.726  
 Approx.F= 60.668 df= 7, 160 p-tail= 0.0000

Lawley-Hotelling trace= 2.654  
 Approx.F= 60.668 df= 7, 160 p-tail= 0.0000

**Table S48.** Canonical discriminant functions

|          | 1         |
|----------|-----------|
| Constant | 147.820   |
| VAR00002 | 135.343   |
| VAR00003 | -3959.088 |
| VAR00004 | 748.417   |
| VAR00005 | -3968.809 |
| VAR00006 | 4568.217  |
| VAR00007 | -5826.484 |
| VAR00008 | -1647.221 |
| VAR00009 | .         |
| VAR00010 | .         |

**Table S49.** Canonical discriminant functions -- standardized by within variances

|          | 1      |
|----------|--------|
| VAR00002 | 0.112  |
| VAR00003 | -5.178 |
| VAR00004 | 1.591  |
| VAR00005 | -7.855 |
| VAR00006 | 4.630  |
| VAR00007 | -6.687 |
| VAR00008 | -2.629 |
| VAR00009 | .      |
| VAR00010 | .      |

**Table S50.** Canonical scores of group means

|        | 1      |
|--------|--------|
| SperM  | 1.619  |
| SpermD | -1.619 |

### Analysis Layer 3: Determination of analyte concentration - Histamine

#### Principal Components

| Variable | Components |            |            |             |             |             |             |             |            |
|----------|------------|------------|------------|-------------|-------------|-------------|-------------|-------------|------------|
|          | 1          | 2          | 3          | 4           | 5           | 6           | 7           | 8           | 9          |
| Var2     | -0.0996517 | 0.19603688 | 0.59420967 | -0.49225298 | 0.49363214  | -0.03725154 | 0.2972222   | 0.10087007  | 0.11253757 |
| Var3     | -0.5848758 | 0.18277998 | 0.08939255 | -0.26868102 | -0.48536    | 0.09730824  | -0.31787822 | 0.09066675  | 0.43591383 |
| Var4     | -0.6068441 | -0.2121961 | -0.1283041 | 0.4371433   | 0.16082656  | -0.06002935 | 0.56579781  | 0.03871043  | 0.16751797 |
| Var5     | 0.1190467  | -0.6428119 | 0.29395112 | 0.20383555  | 0.25526008  | 0.13747677  | -0.39851001 | 0.1241919   | 0.43170947 |
| Var6     | 0.30444878 | -0.4353842 | -0.0654417 | -0.39148328 | -0.46100751 | 0.10407004  | 0.52899736  | 0.15724172  | 0.17968868 |
| Var7     | 0.04330348 | -0.0073835 | -0.6306344 | -0.35224214 | 0.36686978  | -0.38719746 | -0.09097931 | -0.08546247 | 0.41976118 |
| Var8     | 0.0907756  | 0.27757123 | -0.3157123 | 0.03848746  | 0.23055997  | 0.72018254  | 0.04240509  | 0.47438017  | 0.12207749 |
| Var9     | 0.29712394 | 0.32790411 | 0.12508006 | 0.25374618  | -0.07220192 | 0.19103236  | 0.19675352  | -0.59662783 | 0.53645211 |
| Var10    | 0.27289292 | 0.30942827 | 0.13694037 | 0.33113772  | -0.15568422 | -0.50073075 | 0.05522116  | 0.59300297  | 0.26778334 |

|           |            |            |            |            |            |            |            |            |            |
|-----------|------------|------------|------------|------------|------------|------------|------------|------------|------------|
| Variance  | 0.00000058 | 0.00000014 | 0.00000001 | 0          | 0          | 0          | 0          | 0          | 0          |
| Variance% | 78.5836257 | 19.0674610 | 1.46593022 | 0.54443502 | 0.12675329 | 0.09929826 | 0.06973325 | 0.02637853 | 0.01638013 |
| Cum%      | 78.5836257 | 97.6510925 | 99.1170196 | 99.6614532 | 99.7882080 | 99.8875045 | 99.9572372 | 99.9836196 | 100        |
| P-value   |            |            |            |            |            |            |            |            |            |



## Standardized Principal Components

| Variable | Components  |             |             |             |             |             |             |             |             |
|----------|-------------|-------------|-------------|-------------|-------------|-------------|-------------|-------------|-------------|
|          | 1           | 2           | 3           | 4           | 5           | 6           | 7           | 8           | 9           |
| Var2     | -130.618896 | 521.6490479 | 5702.563965 | -7751.79736 | 16110.56934 | -1373.60071 | 13078.21191 | 7216.458496 | 10217.05957 |
| Var3     | -766.628113 | 486.3728027 | 857.8903198 | -4231.07813 | -15840.5938 | 3588.111084 | -13987.1074 | 6486.491699 | 39575.73828 |
| Var4     | -795.423157 | -564.648376 | -1231.32056 | 6883.952637 | 5248.863281 | -2213.50195 | 24895.93359 | 2769.42627  | 15208.62012 |
| Var5     | 156.0409393 | -1710.50598 | 2821.016113 | 3209.918213 | 8330.870117 | 5069.271973 | -17535.0254 | 8884.951172 | 39194.03516 |
| Var6     | 399.057312  | -1158.54626 | -628.03717  | -6164.91748 | -15045.8066 | 3837.443115 | 23276.66016 | 11249.40625 | 16313.57324 |
| Var7     | 56.76018906 | -19.6475105 | -6052.12793 | -5546.96436 | 11973.45313 | -14277.3877 | -4003.2229  | -6114.1665  | 38109.27344 |
| Var8     | 118.9844437 | 738.6098633 | -3029.85596 | 606.0846558 | 7524.737793 | 26555.76563 | 1865.885986 | 33938.16406 | 11083.16992 |
| Var9     | 389.4562683 | 872.5443115 | 1200.379395 | 3995.890381 | -2356.43896 | 7044.0625   | 8657.443359 | -42684.0195 | 48703.40625 |
| Var10    | 357.6953735 | 823.3806152 | 1314.201416 | 5214.620605 | -5081.03369 | -18463.7754 | 2429.811768 | 42424.69141 | 24311.51172 |

|           |             |             |             |             |             |             |             |             |            |
|-----------|-------------|-------------|-------------|-------------|-------------|-------------|-------------|-------------|------------|
| Variance  | 0.00000058  | 0.00000014  | 0.00000001  | 0           | 0           | 0           | 0           | 0           | 0          |
| Variance% | 78.58362579 | 19.06746101 | 1.46593022  | 0.54443502  | 0.12675329  | 0.09929826  | 0.06973325  | 0.02637853  | 0.01638013 |
| Cum%      | 78.58362579 | 97.65109253 | 99.11701965 | 99.66145325 | 99.78820801 | 99.88750458 | 99.95723724 | 99.98361969 | 100        |
| P-value   |             |             |             |             |             |             |             |             |            |

### References for the supporting information

- (1) E. M. Enlow, J. L. Kennedy, A. A. Nieuwland, J. E. Hendrix, S. L. Morgan *Appl. Spectrosc.* **2005**, *59*, 986-992.
